# Supplementary material
Source: Springer Nature journal article supplement (https://www.springermedizin.de/resource/supplementary/13012_2013_687_MOESM1_ESM.pdf/9630240)
Supplement: MOESM1 [file 9630240]

| Factors Impacting Diffusion       | Integration of Prescribing into Pharmacy Practice             |                                                                                  |                                                                            |                                                                      |                                                 |
|-----------------------------------|---------------------------------------------------------------|----------------------------------------------------------------------------------|----------------------------------------------------------------------------|----------------------------------------------------------------------|-------------------------------------------------|
|                                   | Not Prescribing<br>Performs activities similar to prescribing | Product-Focused Prescribing<br>• Extend stable therapy or ensure adequate supply | Disease-Focused Prescribing<br>• Adapting<br>• Protocol- or disease-driven | Patient-Focused Prescribing<br>• Focus on initial patient assessment | Not Prescribing<br>Member of an integrated team |
| Number of Pharmacists             | 5                                                             | 16                                                                               | 7                                                                          | 5                                                                    | 5                                               |
| Frequency of APA                  | 1 (12.5%)                                                     | 0                                                                                | 7 (100%)                                                                   | 5 (100%)                                                             | 0                                               |
| Characteristics of the Innovation |                                                               | Legitimize Prior practices +++                                                   |                                                                            |                                                                      |                                                 |
|                                   | Low Advantage +++                                             | Low Advantage +                                                                  |                                                                            |                                                                      | Low Advantage +++                               |
|                                   | Straightforward +                                             | ← Nature of Knowledge Required →                                                 |                                                                            | Complex +                                                            |                                                 |
|                                   |                                                               | Liability                                                                        |                                                                            |                                                                      |                                                 |
| Pharmacist as Adopter             | Varied Self-Efficacy                                          | Low Self-Efficacy                                                                | High Self-Efficacy in Area of Practice Focus                               |                                                                      |                                                 |
|                                   |                                                               | Patient Responsibility +++                                                       |                                                                            |                                                                      |                                                 |
| System Readiness for Prescribing  | Product Focused Practice +++                                  |                                                                                  | Patient Focused Practice +++                                               |                                                                      |                                                 |
|                                   |                                                               | Independent Com                                                                  |                                                                            | Independent Com                                                      |                                                 |
|                                   |                                                               | Chain Com                                                                        |                                                                            |                                                                      |                                                 |
|                                   | Hospital                                                      |                                                                                  | Hospital                                                                   |                                                                      | Hospital                                        |
|                                   | PCN                                                           |                                                                                  | PCN                                                                        |                                                                      |                                                 |
| Communication & Influence         | Relationship with Physician +++                               |                                                                                  |                                                                            |                                                                      |                                                 |
|                                   |                                                               | Formal Dissemination                                                             |                                                                            |                                                                      |                                                 |

APA = Advanced Prescribing Status; +++ = Strong Influence on adoption of prescribing; PCN = Primary Care Network; SE = Self-Efficacy; Com = Community Pharmacy
